# Supplementary material
Source: PubMed Central journal article supplement (PMC6754263)
Supplement: EMS83997-supplement-SI.pdf [file EMS83997-supplement-SI.pdf]

**ADVANCED  
HEALTHCARE  
MATERIALS**

Supporting Information

for *Adv. Healthcare Mater.*, DOI: 10.1002/adhm.201900612

Cell Membrane-Coated Magnetic Nanocubes with a Homotypic Targeting Ability Increase Intracellular Temperature due to ROS Scavenging and Act as a Versatile Theranostic System for Glioblastoma Multiforme

*Christos Tapeinos,\* Francesca Tomatis, Matteo Battaglini, Aitor Larrañaga, Attilio Marino, Iker Aguirrezabal Telleria, Makis Angelakeris, Doriana Debellis, Filippo Drago, Francesca Brero, Paolo Arosio, Alessandro Lascialfari, Andrea Petretto, Edoardo Sinibaldi, and Gianni Ciofani\**

## Supporting information

**Cell membrane-coated magnetic nanocubes with a homotypic targeting ability increase intracellular temperature due to ROS scavenging and act as a versatile theranostic system for glioblastoma multiforme**

*Christos Tapeinos<sup>a,†,\*</sup>, Francesca Tomatis<sup>b,†</sup>, Matteo Battaglini<sup>a,c</sup>, Aitor Larrañaga<sup>d</sup>, Attilio Marino<sup>a</sup>, Iker Aguirrezabal Telleria<sup>e</sup>, Angelakeris Makis<sup>f</sup>, Doriana Debellis<sup>g</sup>, Filippo Drago<sup>h</sup>, Francesca Brero<sup>i</sup>, Paolo Arosio<sup>j</sup>, Alessandro Lascialfari<sup>j</sup>, Andrea Petretto<sup>k</sup>, Edoardo Sinibaldi<sup>l</sup>, Gianni Ciofani<sup>a,b,\*</sup>*

<sup>a</sup>Smart Bio-Interfaces, Istituto Italiano di Tecnologia, 56025 Pontedera, Italy

<sup>b</sup>Department of Mechanical and Aerospace Engineering, Politecnico di Torino, 10129 Torino, Italy

<sup>c</sup>The Biorobotics Institute, Scuola Superiore Sant'Anna, 56025 Pontedera, Italy

<sup>d</sup>Department of Mining-Metallurgy Engineering and Materials Science & POLYMAT, University of the Basque Country, 48013 Bilbao, Spain

<sup>e</sup>Department of Chemical and Environmental Engineering, Engineering School of the University of the Basque Country (UPV/EHU), 48013 Bilbao, Spain

<sup>f</sup>Department of Physics, Aristotle University of Thessaloniki, 54124 Thessaloniki, Greece

<sup>g</sup>Electron microscopy facility, Istituto Italiano di Tecnologia, 16163 Genova, Italy

<sup>h</sup>Nanochemistry Department, Istituto Italiano di Tecnologia, Genova, 16163 Italy

<sup>i</sup>Department of Physics and INSTM, Università degli Studi di Pavia, 27100 Pavia, Italy

<sup>j</sup>Department of Physics and INSTM, Università degli Studi di Milano, 20133 Milano, Italy

<sup>k</sup>Core Facilities-Clinical Proteomics and Metabolomics Laboratory, IRCCS Istituto Giannina Gaslini, 16147 Genova, Italy

<sup>1</sup>Center for Micro-BioRobotics, Istituto Italiano di Tecnologia, 56025 Pontedera, Italy

<sup>†</sup> These authors equally contributed to this work

\* Corresponding authors: [christos.tapeinos@iit.it](mailto:christos.tapeinos@iit.it), [gianni.ciofani@iit.it](mailto:gianni.ciofani@iit.it)

### Transmission Electron microscopy

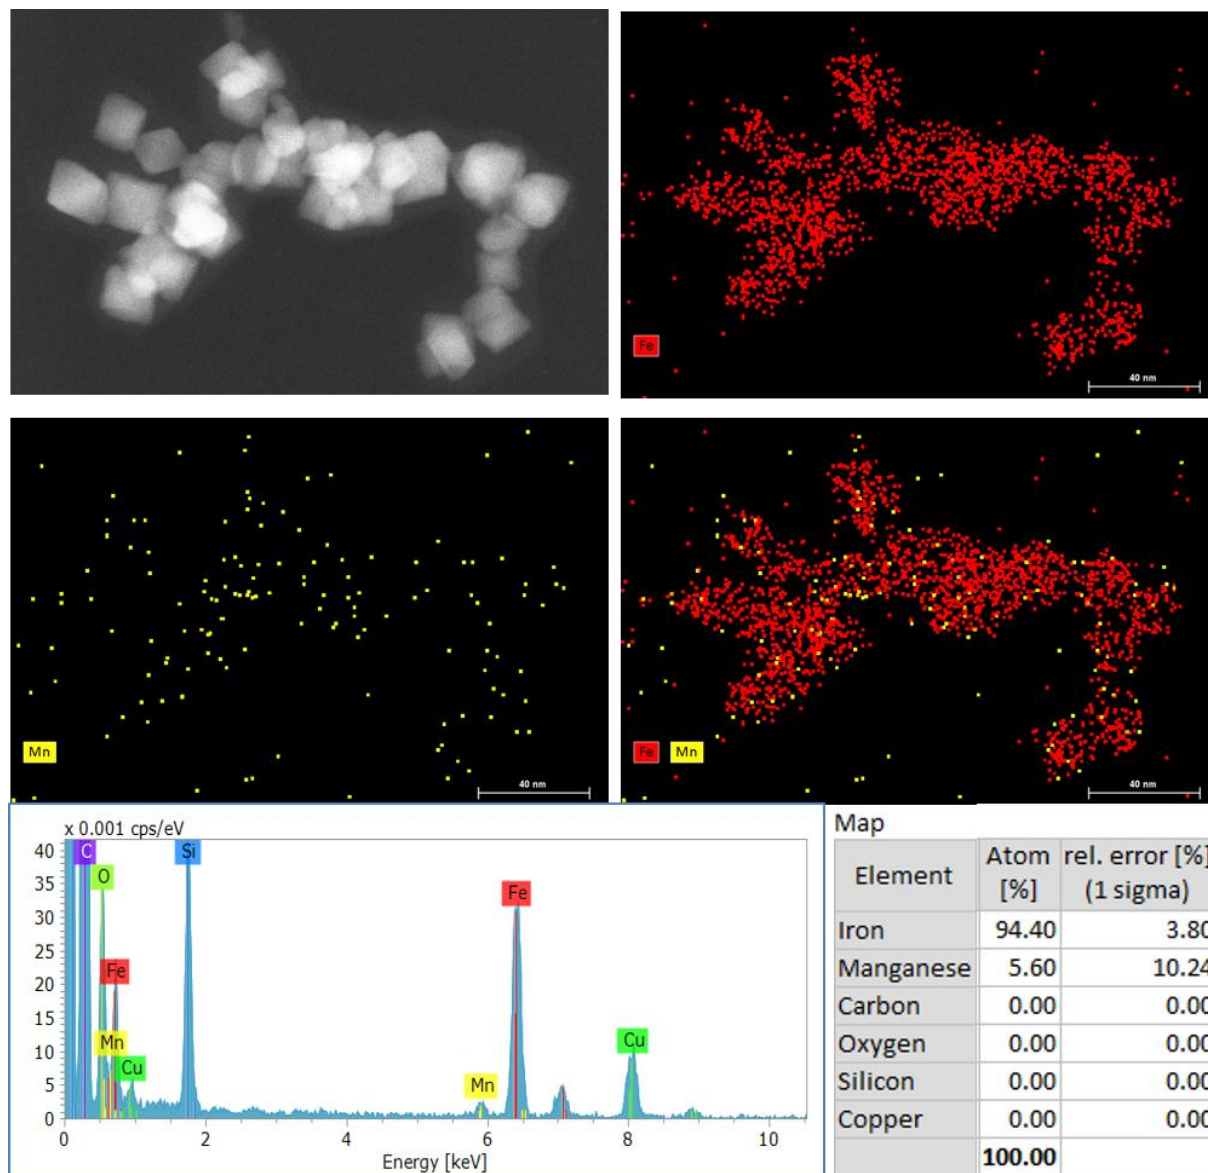

**Figure S1. Transmission electron micrograph and electron dispersive x-ray analysis of the plain NCubes**

### X-ray diffraction

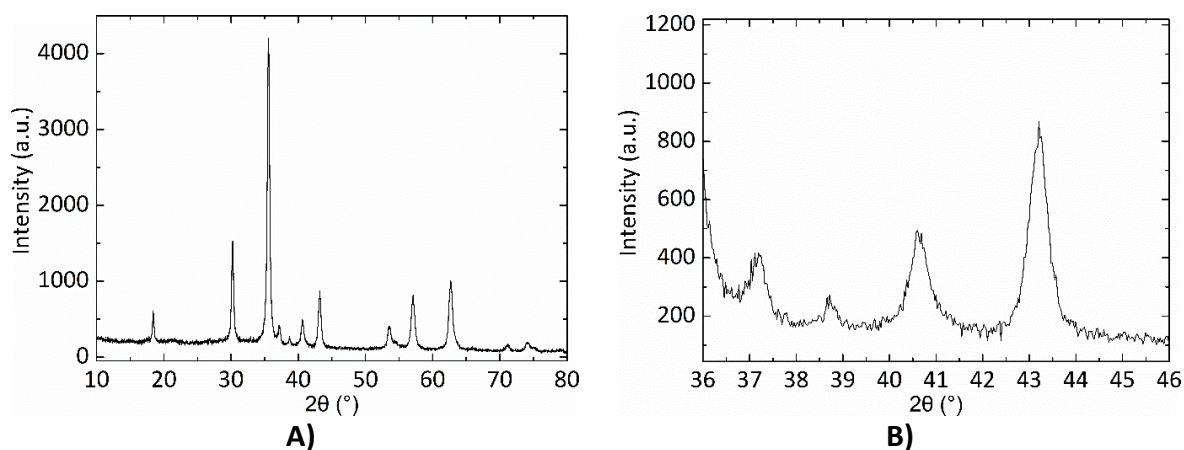

Figure S2. A) X-ray diffraction spectrum of CM-NCubes and B) magnified spectrum showing the peak of  $\text{MnO}_2$  at  $2\theta = 38.6^\circ$ . The remaining peaks correspond to the  $\text{Fe}_3\text{O}_4$  structure.

Table S1. Table presenting X-ray diffraction peaks, their corresponding characteristics (height, full width at half maximum, atomic spacing, relevant intensity, and Miller indices) and the reference material.

| Pos. [ $2\theta^\circ$ ] | Height [cts] | FWHM [ $2\theta^\circ$ ] | d-spacing [ $\text{\AA}$ ] | Rel. Int. [%] | Crystal lattice values | Matched by                            |
|--------------------------|--------------|--------------------------|----------------------------|---------------|------------------------|---------------------------------------|
| 18.2673                  | 389.44       | 0.1535                   | 4.85868                    | 9.75          | 111                    | 01-088-0866                           |
| 30.0833                  | 1255.28      | 0.2558                   | 2.97185                    | 31.44         | 220                    | 01-088-0866                           |
| 35.4372                  | 3992.20      | 0.3326                   | 2.53418                    | 100.00        | 311                    | 01-088-0866                           |
| 37.0519                  | 217.58       | 0.2558                   | 2.42736                    | 5.45          | 222                    | 01-088-0866                           |
| 38.5983                  | 81.40        | 0.1535                   | 2.33360                    | 2.04          | 211                    | 00-011-0055                           |
| 40.5006                  | 309.47       | 0.3070                   | 2.22828                    | 7.75          | -                      | 01-076-0123                           |
| 43.0936                  | 689.83       | 0.2047                   | 2.10002                    | 17.28         | 400                    | 01-088-0866                           |
| 53.4315                  | 264.65       | 0.4605                   | 1.71556                    | 6.63          | 422                    | 01-076-0123; 01-088-0866              |
| 56.9752                  | 673.24       | 0.5628                   | 1.61699                    | 16.86         | 511                    | 01-088-0866                           |
| 62.5830                  | 881.93       | 0.1791                   | 1.48492                    | 22.09         | 440                    | 00-011-0055; 01-076-0123; 01-088-0866 |
| 65.9179                  | 49.60        | 0.3000                   | 1.41765                    | 1.24          | -                      | 01-088-0866                           |
| 71.0806                  | 73.66        | 0.4093                   | 1.32683                    | 1.85          | 620                    | 01-088-0866                           |
| 74.0204                  | 101.66       | 0.6240                   | 1.27966                    | 2.55          | 533                    | 00-011-0055; 01-076-0123; 01-088-0866 |

Table S2. Reference codes and reference materials that were used to characterize the XRD spectrum

| Visible | Ref. Code   | Score | Compound Name          | Displacement [ $2\theta$ ] | Scale Factor | Chemical Formula        |
|---------|-------------|-------|------------------------|----------------------------|--------------|-------------------------|
| *       | 00-011-0055 | 40    | Ramsdellite            | -0.321                     | 0.040        | $\text{MnO}_2$          |
| *       | 01-076-0123 | 41    | Iron Oxide Hydroxide   | -0.219                     | 0.087        | $\text{FeOOH}$          |
| *       | 01-088-0866 | 98    | Magnetite (Cr-bearing) | -0.092                     | 0.923        | $\text{Fe}_3\text{O}_4$ |

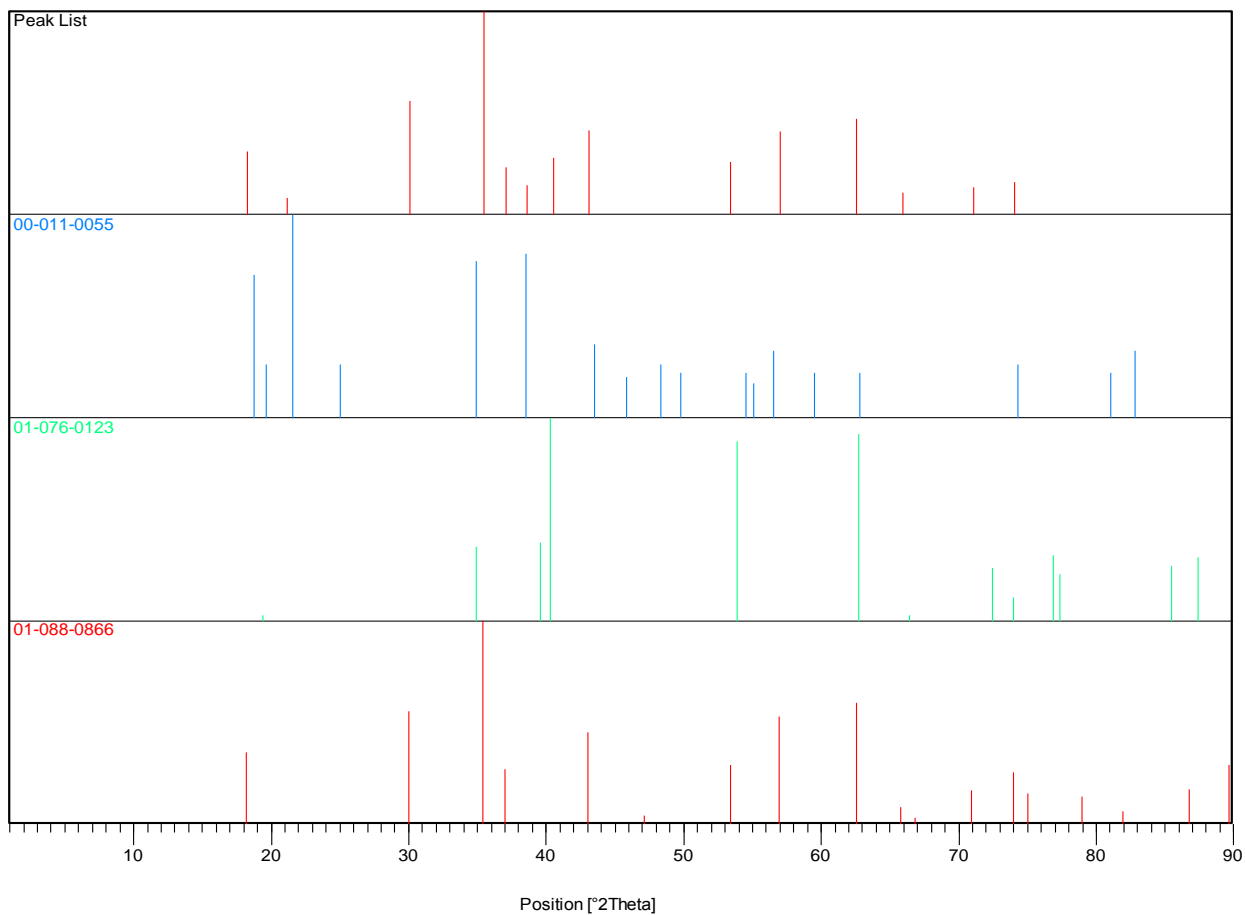

**Figure S3. A) X-ray diffraction patterns of the reference materials presented in Table S2.**

X-ray photoelectron spectroscopy

Table S3. Elemental analysis of the surface of the NCubes obtained by using X-ray photoelectron spectroscopy

| Element | Peak               | Position (eV) | FWHM  | % Conc. | %At. rel. |
|---------|--------------------|---------------|-------|---------|-----------|
| C       | C-C/C-H            | 284.6         | 2.676 | 12.8    | 12.8      |
| O       | O 1s               | 529.9         | 2.309 | 51.1    | 58.3      |
|         | O 1s               | 532.2         | 2.309 | 7.2     |           |
| N       | N 1s               | 399.6         | 2.086 | 2.1     | 2.1       |
| Fe      | Fe 2p 3/2 (3+)     | 711.2         | 3.807 | 5.2     | 19.1      |
|         | Fe 2p 1/2 (3+)     | 724.9         | 3.275 | 2.6     |           |
|         | Fe 2p 3/2 sat (3+) | 719.0         | 5.578 | 3.3     |           |
|         | Fe 2p 1/2 (3+)     | 732.1         | 6.251 | 1.7     |           |
|         | Fe 2p 3/2 (2+)     | 710.2         | 2.418 | 2.4     |           |
|         | Fe 2p 1/2 (2+)     | 723.3         | 2.695 | 1.2     |           |
|         | Fe 2p 3/2 sat (2+) | 713.9         | 3.982 | 1.8     |           |
|         | Fe 2p 1/2 (2+)     | 727.4         | 3.09  | 0.9     |           |
| Mn      | Mn 2p 3/2          | 641.3         | 3.527 | 2.3     | 3.5       |
|         | Mn 2p 1/2          | 653.0         | 3.648 | 1.2     |           |
| Na      | Na 1s              | 1071.6        | 2.315 | 1.6     | 1.6       |
| Si      | Si 2s              | 152.6         | 2.997 | 2.7     | 2.7       |

$$Fe(3+)/Fe(2+) = 2$$

Table S4. Elemental analysis of the surface of the CM-NCubes obtained by using X-ray photoelectron spectroscopy

| Element | Peak               | Position (eV) | FWHM  | % Conc. | %At. rel. |
|---------|--------------------|---------------|-------|---------|-----------|
| C       | C-C/C-H            | 284.6         | 2.625 | 39.3    | 47.3      |
|         | C-O                | 287.5         | 2.362 | 8.0     |           |
| O       | O 1s               | 529.9         | 2.708 | 25.8    | 37.0      |
|         | O 1s               | 531.7         | 2.708 | 11.2    |           |
| N       | N 1s               | 399.8         | 2.488 | 8.6     | 8.6       |
| Fe      | Fe 2p 3/2 (3+)     | 711.3         | 3.249 | 1.9     | 5.1       |
|         | Fe 2p 1/2 (3+)     | 724.9         | 3.581 | 1.0     |           |
|         | Fe 2p 3/2 sat (3+) | 719.1         | 3.554 | 0.3     |           |
|         | Fe 2p 1/2 (3+)     | 733.6         | 3.351 | 0.2     |           |
|         | Fe 2p 3/2 (2+)     | 710.1         | 2.475 | 0.8     |           |
|         | Fe 2p 1/2 (2+)     | 723.0         | 3.027 | 0.4     |           |
|         | Fe 2p 3/2 sat (2+) | 713.7         | 2.932 | 0.3     |           |
|         | Fe 2p 1/2 (2+)     | 727.3         | 3.512 | 0.2     |           |
| Mn      | Mn 2p 3/2          | 641.6         | 3.589 | 1.4     | 2.1       |
|         | Mn 2p 1/2          | 653.3         | 3.804 | 0.7     |           |

$$Fe(3+)/Fe(2+) = 2$$

Sodium dodecyl sulfate polyacrylamide gel electrophoresis (SDS-PAGE) and mass spectroscopy

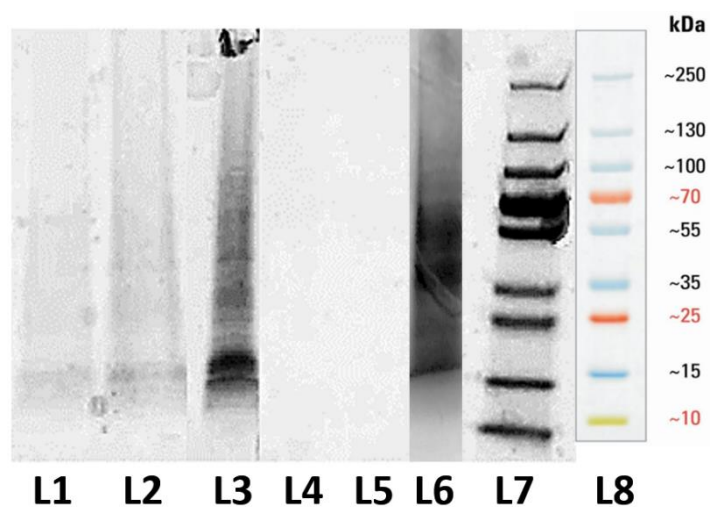

A)

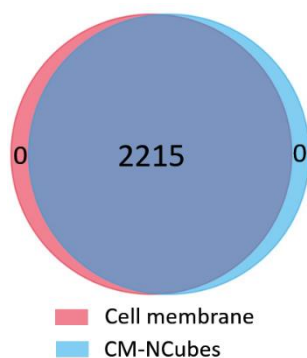

B)

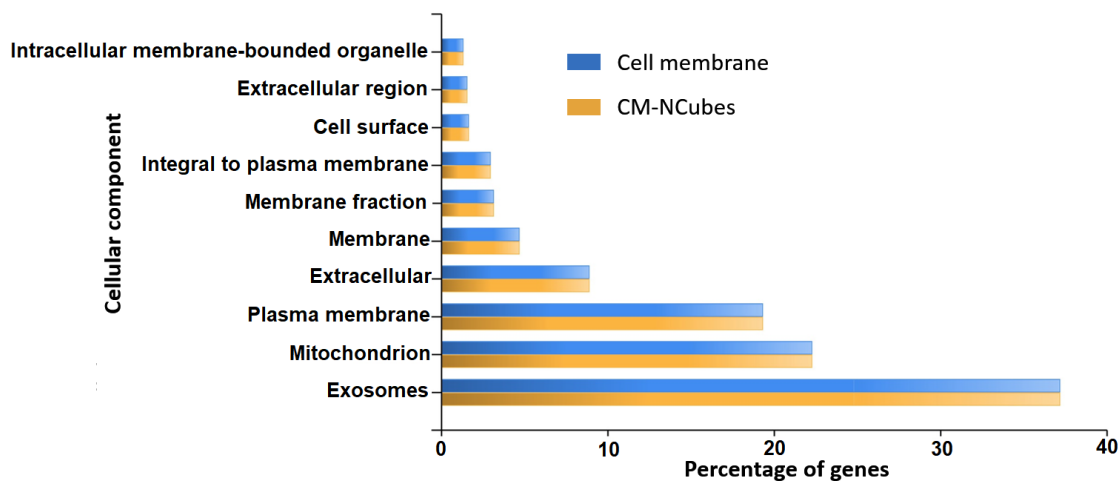

C)

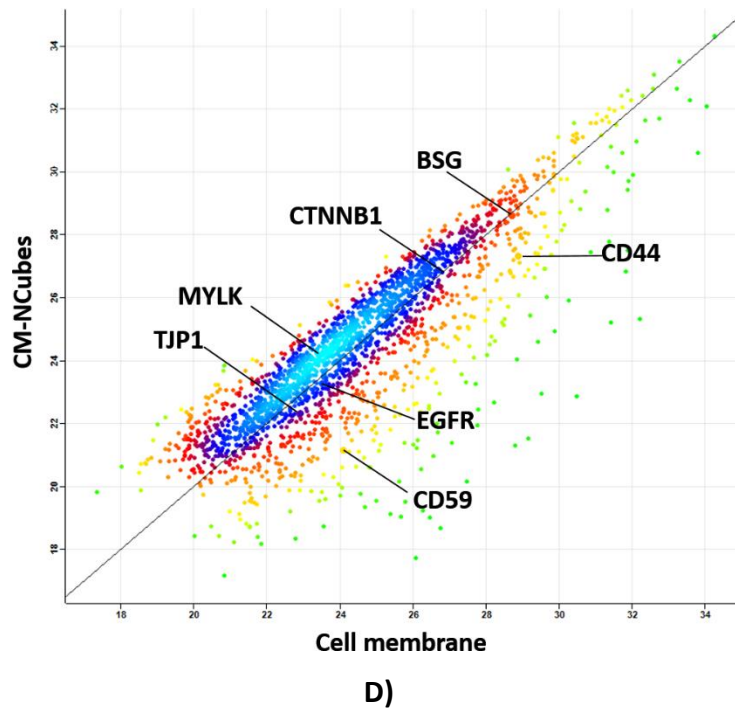

Figure S4. A) SDS-Page of L1) CM-NCubes 3.75 $\mu\text{g}$  (125  $\mu\text{g ml}^{-1}$ ), L2) CM-NCubes 7.0  $\mu\text{g}$  (250  $\mu\text{g ml}^{-1}$ ), L3) CM-NCubes 14  $\mu\text{g}$  (500  $\mu\text{g ml}^{-1}$ ), L4) NCubes 7.0  $\mu\text{g}$  (250  $\mu\text{g ml}^{-1}$ ), L5) NCubes 14.0  $\mu\text{g}$  (500  $\mu\text{g ml}^{-1}$ ), L6) pure cell membrane extracted from  $6 \times 10^6$  cells, L7) marker, L8) molecular weight ladder; B) Venn diagram presenting the number of common proteins found on the purified cell membrane and on the surface of CM-NCubes; C) bar chart, derived from mass spectroscopy analysis, presenting the proteins per cell compartment for the extracted cell membrane (blue bars) and for the CM-NCubes (yellow bar) – x axis represents the percentage of the genes associated with the proteins of the membrane presented in the y axis- and D) Volcano plot derived from the mass spectroscopy data demonstrating that the proteins found on the surface of the CM-NCubes are the same as the proteins from the extracted cell membrane.

### *N<sub>2</sub> adsorption-desorption and BET analysis*

Figure S4a shows the adsorption volume of N<sub>2</sub> as a function of the relative pressure of N<sub>2</sub> at 77 K. These data show a continuous uptake up to P/P<sub>0</sub> of 0.8; above this value, a sharp increase in adsorbed volume occurs. These effects are attributed to the presence of two types of pores within NCubes: one related to the presence of intrapores in the lower mesopore range (ca. 2 nm) and one related to the interparticle pore volume (>10 nm in size) (Fig. S4b). This sample shows a BET surface area of 34 m<sup>2</sup> g<sup>-1</sup>, as derived from the formation of the first N<sub>2</sub> monolayer at relative pressures corresponding to pores around 2 nm.



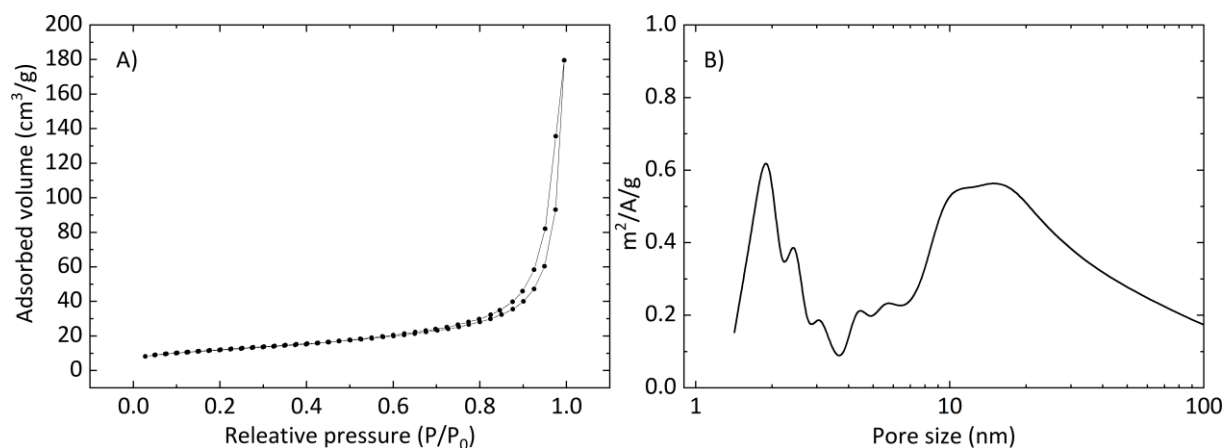

**Figure S5. A) Isotherm curves generated during the adsorption and desorption of nitrogen from NCubes, B) Pore size distribution of NCubes**

Nitrogen physisorption isotherms were obtained at 77 K on Autosorb 1C (Quantachrome) automatic device. Samples were previously degassed at 423 K for 3 h. The pore size distribution was derived using the Barrett–Joyner–Halenda (BJH) method.<sup>1</sup> The specific surface area was calculated using the Brunauer–Emmett–Teller (BET) method:

$$\frac{1}{v \left[ \left( \frac{P_{sat}}{P} \right) - 1 \right]} = \frac{c - 1}{v_m c} \frac{P}{P_{sat}} + \frac{1}{v_m c} \quad \text{Eq. (1)}$$

where  $P$  is the  $N_2$  gas-phase pressure;  $P_{sat}$ ,  $N_2$  saturation pressure;  $v$ , adsorbed gas quantity in volume units;  $v_m$ , the monolayer gas quantity.

## Stability Studies

### NCubes

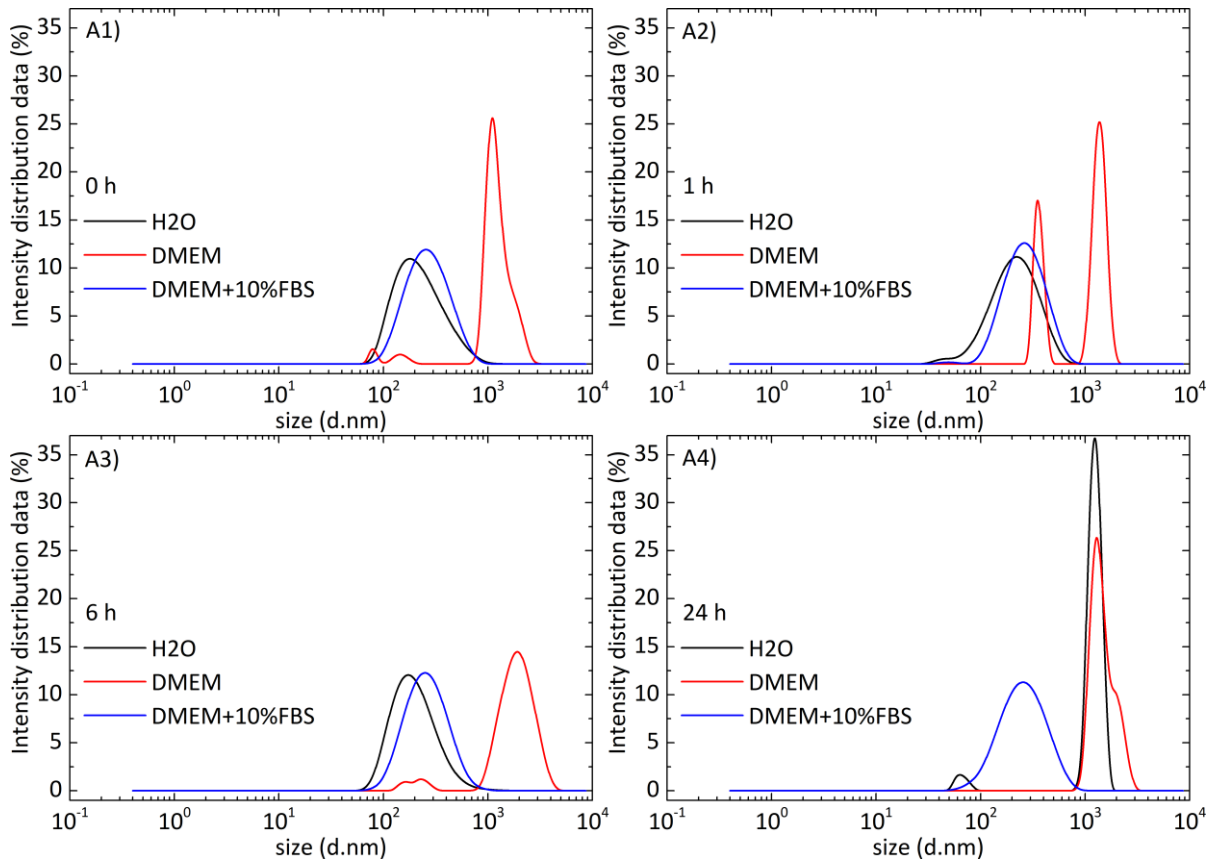

### CM-NCubes

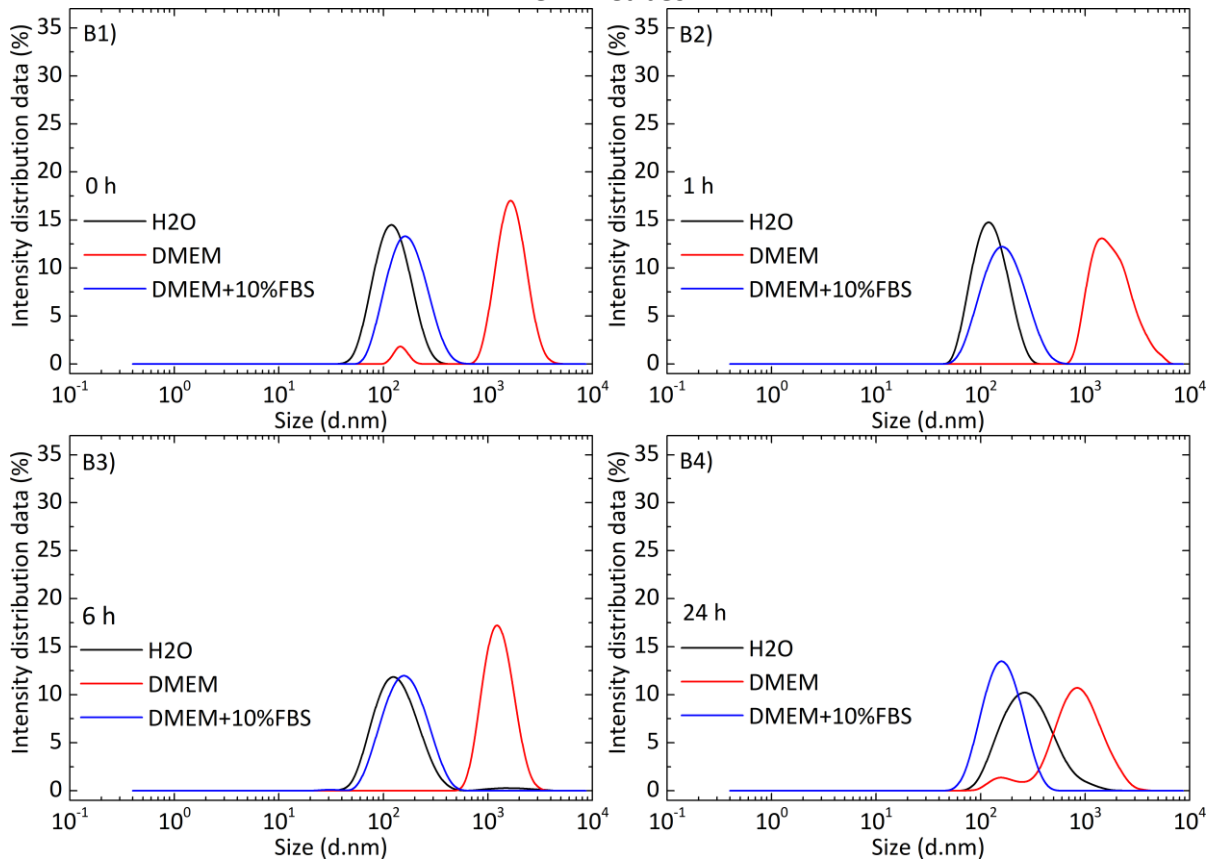

Figure S6. Stability of NCubes (A1-A4) and of CM-NCubes (B1-B4) in different dispersants (H<sub>2</sub>O, DMEM and DMEM+10%FBS) and at different time points (0, 1, 6 and 24 h)

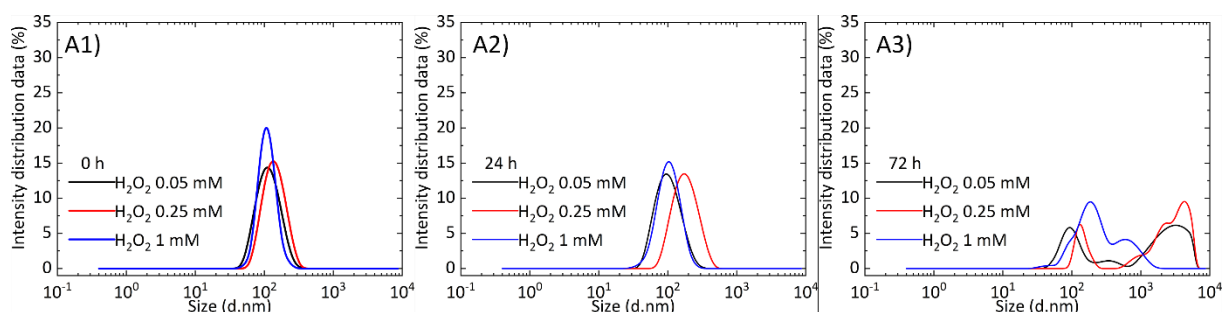

Figure S7. Stability investigation with increasing concentrations of H<sub>2</sub>O<sub>2</sub> in aCSF + albumin, simulating oxidative stress.

### Nuclear magnetic resonance studies

Table S5. Relaxivity values ( $r_1$  and  $r_2$ ) of CM-NCubes at various NMR conditions

| Frequency [MHz] | T1 [ms] | $r_1$ [ $s^{-1}mM^{-1}$ ] | Err $r_1$ [ $s^{-1}mM^{-1}$ ] | T2 [ms] | $r_2$ [ $s^{-1}mM^{-1}$ ] | Err $r_2$ [ $s^{-1}mM^{-1}$ ] |
|-----------------|---------|---------------------------|-------------------------------|---------|---------------------------|-------------------------------|
| 56.7            | 999.7   | 1.76                      | 0.14                          | 14.5    | 174.60                    | 13.97                         |
| 21.3            | 333.0   | 6.86                      | 0.55                          | 13.7    | 184.80                    | 14.78                         |
| 8.5             | 137.0   | 17.63                     | 1.41                          | 13.9    | 182.13                    | 14.57                         |

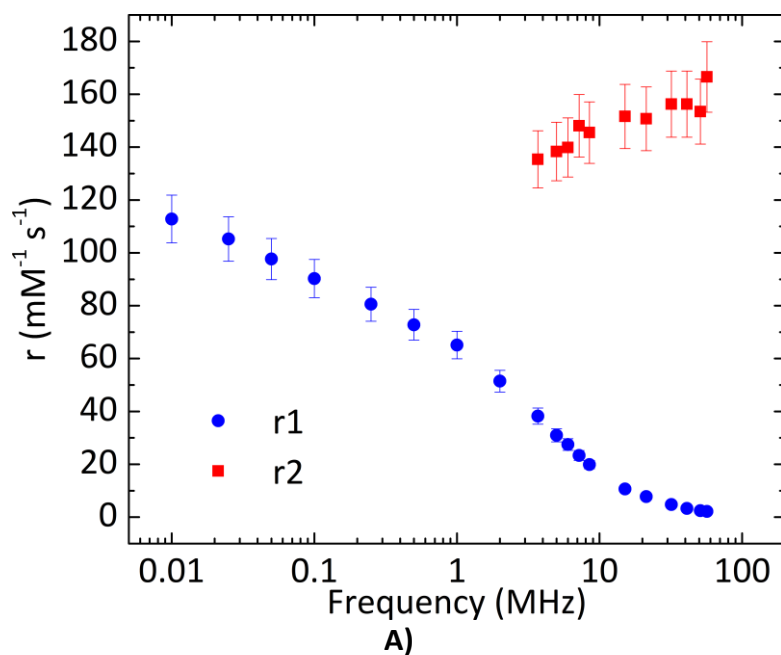

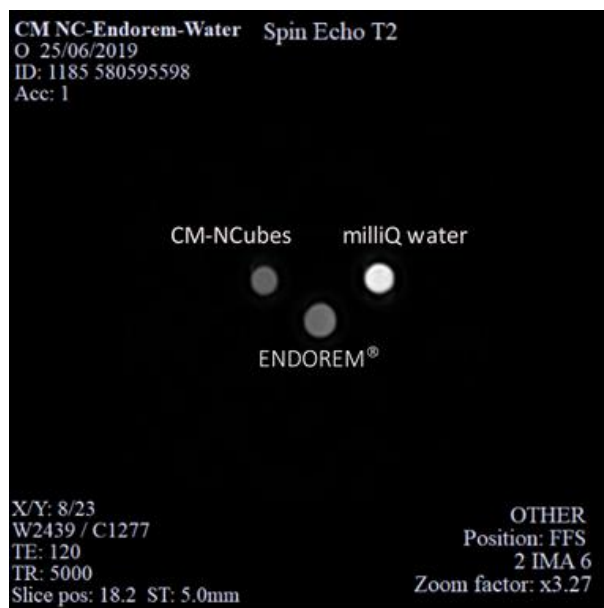

B)

Figure S8. A) Longitudinal  $r_1$  (blue dots) and transverse  $r_2$  (red square) NMR-D profiles collected at room temperature in the frequency range  $0.01 < \nu < 60$  MHz; B) MRI images of vials containing a CM-NCubes dispersion (left, at a concentration of magnetic part equal to 0.08 mM), milliQ water (right) and Endorem® (bottom, at a concentrations of the magnetic part equal to 0.1 mM) obtained by Artoscan (by Esaote SpA) imager at 8.5 MHz by means of high resolution Spin Echo sequence.

### Antioxidant capacity

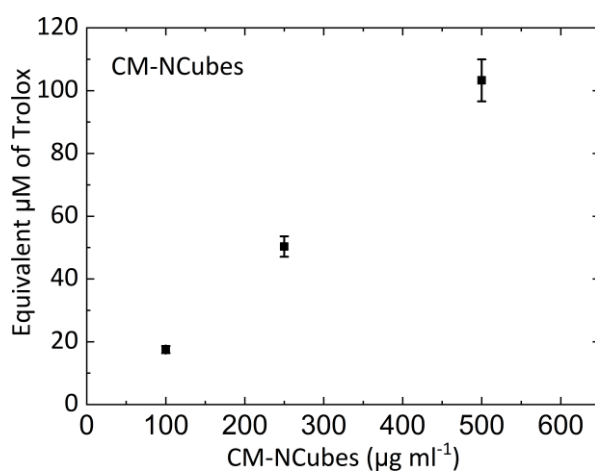

**Figure S9.** Antioxidant capacity of increasing concentrations of CM-NCubes (100, 250 and 500 µg ml<sup>-1</sup>), calculated by using Trolox as a standard.

### Temperature increase due to ROS scavenging

**Video S1.** Control sample showing stable fluorescence intensity; U-251 MG cells incubated with 250 µg ml<sup>-1</sup> of CM-NCubes overnight, after the addition of plain DMEM supplemented with 25 mM HEPES

**Video S2.** Treated sample showing a decrease in fluorescence intensity; U-251 MG cells incubated with 250 µg ml<sup>-1</sup> of CM-NCubes overnight, after the addition of 100 µM of H<sub>2</sub>O<sub>2</sub>

**Video S3.** Negative control sample showing stable fluorescence intensity; U-251 MG cells incubated after the addition of 100 µM of H<sub>2</sub>O<sub>2</sub> diluted in complete DMEM supplemented with 25 mM HEPES

Sorafenib release studies

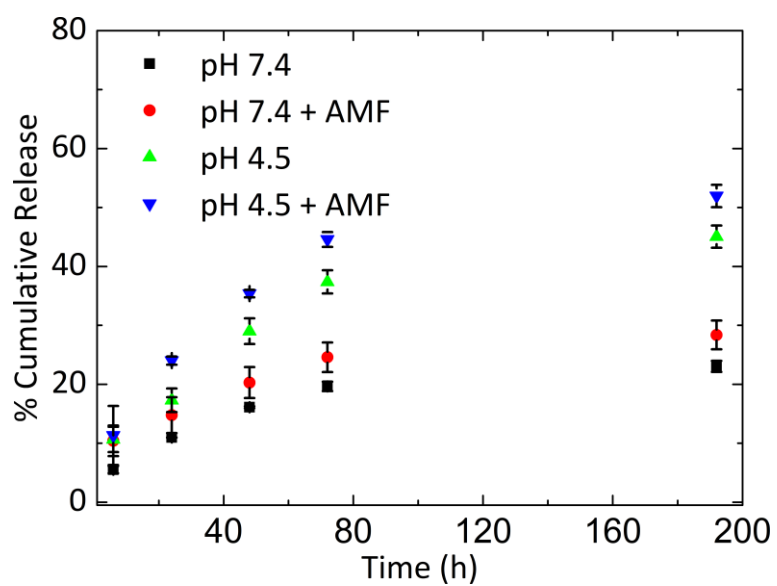

Figure S10. Release profile of the drug sorafenib with and without the use of an AMF and at two different pH values (pH 7.4, pH 4.5, pH7.4+AMF and pH 4.5+AMF). The data are given as the Mean  $\pm$  SD of three technical replicates.

Table S6. Statistical analysis data of lipid-coated (LP) and cell membrane-coated (CM) nanocubes internalized by C8-D1A, bEnd.3, U-251 MG and SH-SY5Y cell lines after 4 and 24 h. The statistical method used was one-way ANOVA; ns = not significant, \* $p < 0.05$ , \*\*  $p < 0.01$ , \*\*\*  $p < 0.001$ , \*\*\*\*  $p < 0.0001$

| Bonferroni's multiple comparisons tests           | Mean Diff. | 95.00% CI of diff. | Significant | Summary |
|---------------------------------------------------|------------|--------------------|-------------|---------|
| C8-D1A-4 h-LP-NCubes vs. C8-D1A-4 h-CM-NCubes     | -3.970     | -20.07 to 12.13    | No          | ns      |
| C8-D1A-4 h-LP-NCubes vs. bEnd.3-4 h-LP-NCubes     | -56.47     | -72.57 to -40.37   | Yes         | ****    |
| C8-D1A-4 h-LP-NCubes vs. bEnd.3-4 h-CM-NCubes     | -45.96     | -62.06 to -29.85   | Yes         | ****    |
| C8-D1A-4 h-LP-NCubes vs. U-251 MG-4 h-LP-NCubes   | -28.02     | -44.12 to -11.92   | Yes         | **      |
| C8-D1A-4 h-LP-NCubes vs. U-251 MG-4 h-CM-NCubes   | -53.61     | -69.71 to -37.51   | Yes         | ****    |
| C8-D1A-4 h-LP-NCubes vs. SH-SY5Y-4 h-LP-NCubes    | 3.775      | -12.33 to 19.88    | No          | ns      |
| C8-D1A-4 h-LP-NCubes vs. SH-SY5Y-4 h-CM-NCubes    | -9.080     | -25.18 to 7.023    | No          | ns      |
| C8-D1A-4 h-CM-NCubes vs. bEnd.3-4 h-LP-NCubes     | -52.50     | -68.60 to -36.40   | Yes         | ****    |
| C8-D1A-4 h-CM-NCubes vs. bEnd.3-4 h-CM-NCubes     | -41.99     | -58.09 to -25.88   | Yes         | ****    |
| C8-D1A-4 h-CM-NCubes vs. U-251 MG-4 h-LP-NCubes   | -24.05     | -40.15 to -7.947   | Yes         | **      |
| C8-D1A-4 h-CM-NCubes vs. U-251 MG-4 h-CM-NCubes   | -49.64     | -65.74 to -33.54   | Yes         | ****    |
| C8-D1A-4 h-CM-NCubes vs. SH-SY5Y-4 h-LP-NCubes    | 7.745      | -8.358 to 23.85    | No          | ns      |
| C8-D1A-4 h-CM-NCubes vs. SH-SY5Y-4 h-CM-NCubes    | -5.110     | -21.21 to 10.99    | No          | ns      |
| bEnd.3-4 h-LP-NCubes vs. bEnd.3-4 h-CM-NCubes     | 10.52      | -5.588 to 26.62    | No          | ns      |
| bEnd.3-4 h-LP-NCubes vs. U-251 MG-4 h-LP-NCubes   | 28.45      | 12.35 to 44.55     | Yes         | **      |
| bEnd.3-4 h-LP-NCubes vs. U-251 MG-4 h-CM-NCubes   | 2.860      | -13.24 to 18.96    | No          | ns      |
| bEnd.3-4 h-LP-NCubes vs. SH-SY5Y-4 h-LP-NCubes    | 60.25      | 44.14 to 76.35     | Yes         | ****    |
| bEnd.3-4 h-LP-NCubes vs. SH-SY5Y-4 h-CM-NCubes    | 47.39      | 31.29 to 63.49     | Yes         | ****    |
| bEnd.3-4 h-CM-NCubes vs. U-251 MG-4 h-LP-NCubes   | 17.94      | 1.832 to 34.04     | Yes         | *       |
| bEnd.3-4 h-CM-NCubes vs. U-251 MG-4 h-CM-NCubes   | -7.655     | -23.76 to 8.448    | No          | ns      |
| bEnd.3-4 h-CM-NCubes vs. SH-SY5Y-4 h-LP-NCubes    | 49.73      | 33.63 to 65.83     | Yes         | ****    |
| bEnd.3-4 h-CM-NCubes vs. SH-SY5Y-4 h-CM-NCubes    | 36.88      | 20.77 to 52.98     | Yes         | ***     |
| U-251 MG-4 h-LP-NCubes vs. U-251 MG-4 h-CM-NCubes | -25.59     | -41.69 to -9.487   | Yes         | **      |
| U-251 MG-4 h-LP-NCubes vs. SH-SY5Y-4 h-LP-NCubes  | 31.80      | 15.69 to 47.90     | Yes         | ***     |
| U-251 MG-4 h-LP-NCubes vs. SH-SY5Y-4 h-CM-NCubes  | 18.94      | 2.837 to 35.04     | Yes         | *       |
| U-251 MG-4 h-CM-NCubes vs. SH-SY5Y-4 h-LP-NCubes  | 57.39      | 41.28 to 73.49     | Yes         | ****    |
| U-251 MG-4 h-CM-NCubes vs. SH-SY5Y-4 h-CM-NCubes  | 44.53      | 28.43 to 60.63     | Yes         | ****    |
| SH-SY5Y-4 h-LP-NCubes vs. SH-SY5Y-4 h-CM-NCubes   | -12.86     | -28.96 to 3.248    | No          | ns      |

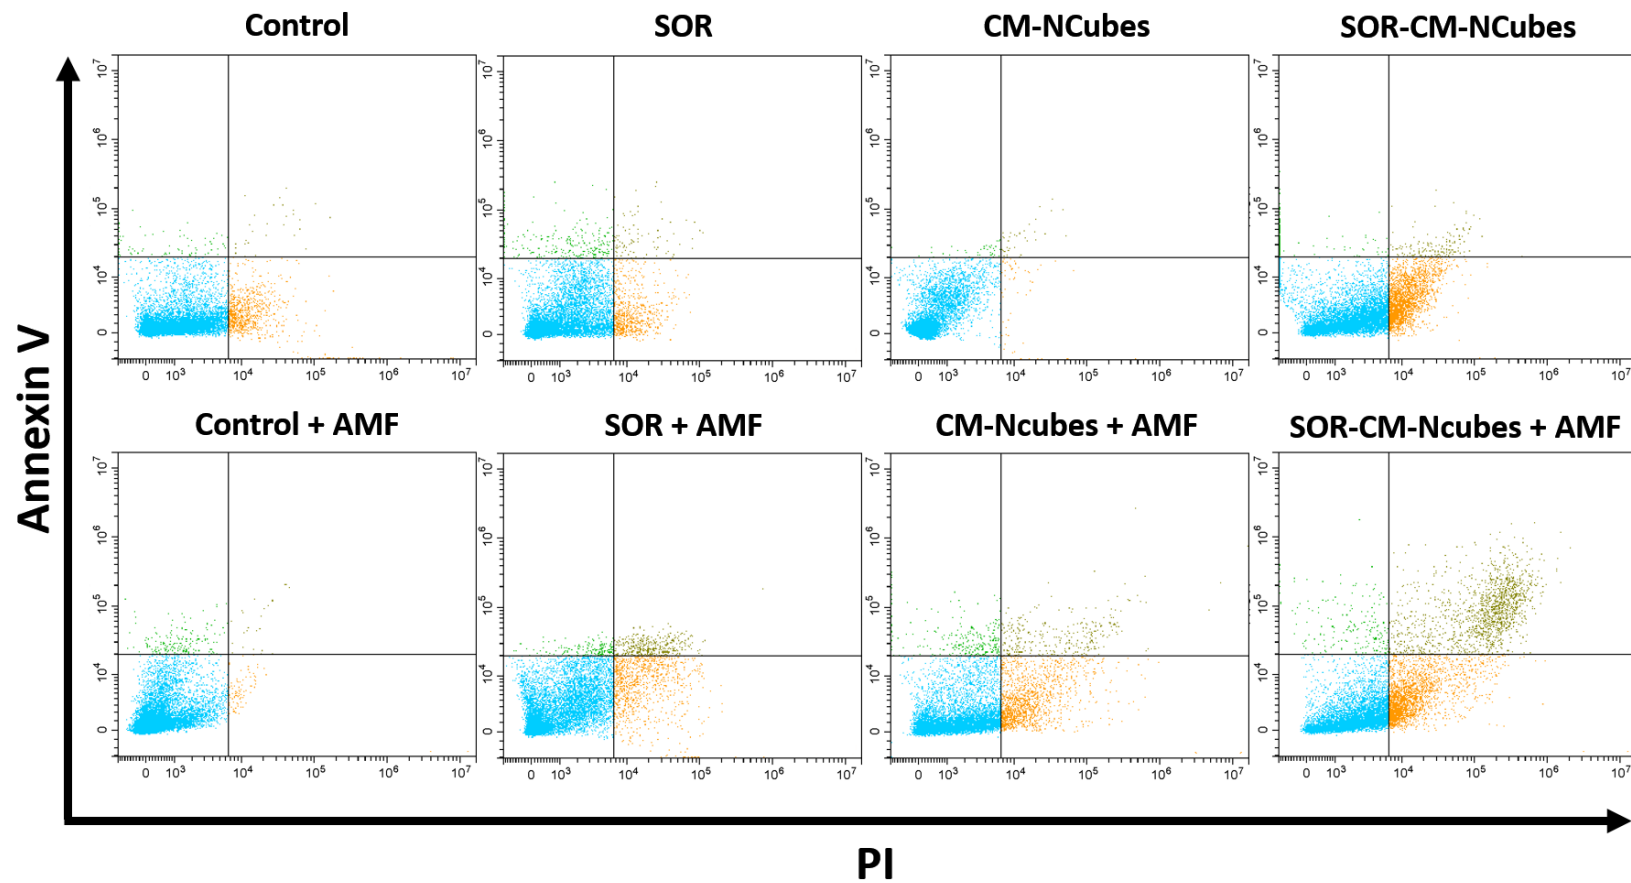

Figure S11. Representative flow cytometry plots depicting viable, early apoptotic, late apoptotic and necrotic cell populations under various treatments



Table S7. Statistical analysis data of caspase 3 activation levels, after treatment with free sorafenib, with cell membrane-coated nanocubes (CM-NCubes), and with cell membrane-coated nanocubes loaded with sorafenib (SOR-CM-NCubes), without and with exposure to an alternating magnetic field (AMF). The statistical method used was one-way ANOVA; ns = not significant, \* $p < 0.05$ , \*\* $p < 0.01$ , \*\*\* $p < 0.001$ , \*\*\*\* $p < 0.0001$ .

| Bonferroni's multiple comparisons test | Mean Diff. | 95.00% CI of diff. | Significant? | Summary |
|----------------------------------------|------------|--------------------|--------------|---------|
| CTRL vs. SOR                           | 0.4443     | -1.436 to 2.325    | No           | ns      |
| CTRL vs. CM-NCubes                     | 0.001446   | -1.879 to 1.882    | No           | ns      |
| CTRL vs. SOR-CM-NCubes                 | -0.9745    | -2.855 to 0.9063   | No           | ns      |
| CTRL vs. CTRL+AMF                      | 0.1860     | -1.695 to 2.067    | No           | ns      |
| CTRL vs. SOR+AMF                       | -0.1658    | -2.046 to 1.715    | No           | ns      |
| CTRL vs. CM-NCubes+AMF                 | -1.089     | -2.970 to 0.7916   | No           | ns      |
| CTRL vs. SOR-CM-NCubes+AMF             | -1.977     | -3.858 to -0.09664 | Yes          | *       |
| SOR vs. CM-NCubes                      | -0.4429    | -2.324 to 1.438    | No           | ns      |
| SOR vs. SOR-CM-NCubes                  | -1.419     | -3.300 to 0.4619   | No           | ns      |
| SOR vs. CTRL+AMF                       | -0.2583    | -2.139 to 1.622    | No           | ns      |
| SOR vs. SOR+AMF                        | -0.6101    | -2.491 to 1.271    | No           | ns      |
| SOR vs. CM-NCubes+AMF                  | -1.533     | -3.414 to 0.3472   | No           | ns      |
| SOR vs. SOR-CM-NCubes+AMF              | -2.422     | -4.302 to -0.5410  | Yes          | **      |
| CM-NCubes vs. SOR-CM-NCubes            | -0.9759    | -2.857 to 0.9048   | No           | ns      |
| CM-NCubes vs. CTRL+AMF                 | 0.1846     | -1.696 to 2.065    | No           | ns      |
| CM-NCubes vs. SOR+AMF                  | -0.1672    | -2.048 to 1.713    | No           | ns      |
| CM-NCubes vs. CM-NCubes+AMF            | -1.091     | -2.971 to 0.7901   | No           | ns      |
| CM-NCubes vs. SOR-CM-NCubes+AMF        | -1.979     | -3.860 to -0.09809 | Yes          | *       |
| SOR-CM-NCubes vs. CTRL+AMF             | 1.160      | -0.7202 to 3.041   | No           | ns      |
| SOR-CM-NCubes vs. SOR+AMF              | 0.8087     | -1.072 to 2.689    | No           | ns      |
| SOR-CM-NCubes vs. CM-NCubes+AMF        | -0.1147    | -1.995 to 1.766    | No           | ns      |
| SOR-CM-NCubes vs. SOR-CM-NCubes+AMF    | -1.003     | -2.884 to 0.8778   | No           | ns      |
| CTRL+AMF vs. SOR+AMF                   | -0.3518    | -2.233 to 1.529    | No           | ns      |
| CTRL+AMF vs. CM-NCubes+AMF             | -1.275     | -3.156 to 0.6055   | No           | ns      |
| CTRL+AMF vs. SOR-CM-NCubes+AMF         | -2.163     | -4.044 to -0.2827  | Yes          | *       |
| SOR+AMF vs. CM-NCubes+AMF              | -0.9234    | -2.804 to 0.9573   | No           | ns      |
| SOR+AMF vs. SOR-CM-NCubes+AMF          | -1.812     | -3.692 to 0.06914  | No           | ns      |

|                                     |         |                  |    |    |
|-------------------------------------|---------|------------------|----|----|
| CM-NCubes+AMF vs. SOR-CM-NCubes+AMF | -0.8882 | -2.769 to 0.9925 | No | ns |
|-------------------------------------|---------|------------------|----|----|

Table S8. Statistical analysis data of the caspase 9 activation levels, after treatment with free sorafenib, with cell membrane-coated nanocubes (CM-NCubes), and with cell membrane-coated nanocubes loaded with sorafenib (SOR-CM-NCubes), without and with exposure to an alternating magnetic field (AMF). The statistical method used was one-way ANOVA; ns = not significant, \* $p < 0.05$ , \*\* $p < 0.01$ , \*\*\* $p < 0.001$ , \*\*\*\* $p < 0.0001$ .

| Bonferroni's multiple comparisons test | Mean Diff. | 95.00% CI of diff. | Significant? | Summary |
|----------------------------------------|------------|--------------------|--------------|---------|
| CTRL vs. SOR                           | -1.313     | -4.245 to 1.620    | No           | ns      |
| CTRL vs. CM-NCubes                     | 0.1785     | -2.754 to 3.111    | No           | ns      |
| CTRL vs. SOR-CM-NCubes                 | -2.806     | -5.739 to 0.1259   | No           | ns      |
| CTRL vs. CTRL+AMF                      | -0.8742    | -3.807 to 2.058    | No           | ns      |
| CTRL vs. SOR+AMF                       | -2.449     | -5.381 to 0.4836   | No           | ns      |
| CTRL vs. CM-NCubes+AMF                 | -1.607     | -4.539 to 1.325    | No           | ns      |
| CTRL vs. SOR-CM-NCubes+AMF             | -6.539     | -9.472 to -3.607   | Yes          | ****    |
| SOR vs. CM-NCubes                      | 1.491      | -1.441 to 4.423    | No           | ns      |
| SOR vs. SOR-CM-NCubes                  | -1.494     | -4.426 to 1.438    | No           | ns      |
| SOR vs. CTRL+AMF                       | 0.4383     | -2.494 to 3.371    | No           | ns      |
| SOR vs. SOR+AMF                        | -1.136     | -4.069 to 1.796    | No           | ns      |
| SOR vs. CM-NCubes+AMF                  | -0.2944    | -3.227 to 2.638    | No           | ns      |
| SOR vs. SOR-CM-NCubes+AMF              | -5.227     | -8.159 to -2.294   | Yes          | ***     |
| CM-NCubes vs. SOR-CM-NCubes            | -2.985     | -5.917 to -0.05254 | Yes          | *       |
| CM-NCubes vs. CTRL+AMF                 | -1.053     | -3.985 to 1.880    | No           | ns      |
| CM-NCubes vs. SOR+AMF                  | -2.627     | -5.560 to 0.3051   | No           | ns      |
| CM-NCubes vs. CM-NCubes+AMF            | -1.785     | -4.718 to 1.147    | No           | ns      |
| CM-NCubes vs. SOR-CM-NCubes+AMF        | -6.718     | -9.650 to -3.785   | Yes          | ****    |
| SOR-CM-NCubes vs. CTRL+AMF             | 1.932      | -1.000 to 4.865    | No           | ns      |
| SOR-CM-NCubes vs. SOR+AMF              | 0.3577     | -2.575 to 3.290    | No           | ns      |
| SOR-CM-NCubes vs. CM-NCubes+AMF        | 1.200      | -1.733 to 4.132    | No           | ns      |
| SOR-CM-NCubes vs. SOR-CM-NCubes+AMF    | -3.733     | -6.665 to -0.8003  | Yes          | **      |
| CTRL+AMF vs. SOR+AMF                   | -1.575     | -4.507 to 1.358    | No           | ns      |
| CTRL+AMF vs. CM-NCubes+AMF             | -0.7327    | -3.665 to 2.200    | No           | ns      |
| CTRL+AMF vs. SOR-CM-NCubes+AMF         | -5.665     | -8.597 to -2.733   | Yes          | ****    |

|                                     |        |                  |     |     |
|-------------------------------------|--------|------------------|-----|-----|
| SOR+AMF vs. CM-NCubes+AMF           | 0.8419 | -2.091 to 3.774  | No  | ns  |
| SOR+AMF vs. SOR-CM-NCubes+AMF       | -4.090 | -7.023 to -1.158 | Yes | **  |
| CM-NCubes+AMF vs. SOR-CM-NCubes+AMF | -4.932 | -7.865 to -2.000 | Yes | *** |

Table S9. Statistical analysis data of ROS generation, after treatment with free sorafenib, with cell membrane-coated nanocubes (CM-NCubes), and with cell membrane-coated nanocubes loaded with sorafenib (SOR-CM-NCubes), without and with their exposure to an alternating magnetic field (AMF). The statistical method used was one-way ANOVA; ns = not significant, \* $p < 0.05$ , \*\* $p < 0.01$ , \*\*\* $p < 0.001$ , \*\*\*\* $p < 0.0001$ .

| Bonferroni's multiple comparisons test | Mean Diff. | 95.00% CI of diff. | Significant? | Summary |
|----------------------------------------|------------|--------------------|--------------|---------|
| CTRL vs. SOR                           | 0.1344     | -2.182 to 2.450    | No           | ns      |
| CTRL vs. CM-NCubes                     | -1.066     | -3.381 to 1.250    | No           | ns      |
| CTRL vs. SOR-CM-NCubes                 | -2.258     | -4.574 to 0.05757  | No           | ns      |
| CTRL vs. CTRL+AMF                      | 0.1126     | -2.203 to 2.429    | No           | ns      |
| CTRL vs. SOR+AMF                       | -0.8054    | -3.121 to 1.511    | No           | ns      |
| CTRL vs. CM-NCubes+AMF                 | -4.544     | -6.860 to -2.228   | Yes          | ****    |
| CTRL vs. SOR-CM-NCubes+AMF             | -3.601     | -5.917 to -1.285   | Yes          | ***     |
| SOR vs. CM-NCubes                      | -1.200     | -3.516 to 1.116    | No           | ns      |
| SOR vs. SOR-CM-NCubes                  | -2.393     | -4.709 to -0.07684 | Yes          | *       |
| SOR vs. CTRL+AMF                       | -0.02184   | -2.338 to 2.294    | No           | ns      |
| SOR vs. SOR+AMF                        | -0.9399    | -3.256 to 1.376    | No           | ns      |
| SOR vs. CM-NCubes+AMF                  | -4.678     | -6.994 to -2.362   | Yes          | ****    |
| SOR vs. SOR-CM-NCubes+AMF              | -3.735     | -6.051 to -1.419   | Yes          | ***     |
| CM-NCubes vs. SOR-CM-NCubes            | -1.193     | -3.509 to 1.123    | No           | ns      |
| CM-NCubes vs. CTRL+AMF                 | 1.178      | -1.138 to 3.494    | No           | ns      |
| CM-NCubes vs. SOR+AMF                  | 0.2601     | -2.056 to 2.576    | No           | ns      |
| CM-NCubes vs. CM-NCubes+AMF            | -3.478     | -5.794 to -1.162   | Yes          | **      |
| CM-NCubes vs. SOR-CM-NCubes+AMF        | -2.535     | -4.851 to -0.2193  | Yes          | *       |
| SOR-CM-NCubes vs. CTRL+AMF             | 2.371      | 0.05500 to 4.687   | Yes          | *       |
| SOR-CM-NCubes vs. SOR+AMF              | 1.453      | -0.8630 to 3.769   | No           | ns      |
| SOR-CM-NCubes vs. CM-NCubes+AMF        | -2.285     | -4.601 to 0.03069  | No           | ns      |
| SOR-CM-NCubes vs. SOR-CM-NCubes+AMF    | -1.342     | -3.658 to 0.9736   | No           | ns      |

|                                     |         |                   |     |      |
|-------------------------------------|---------|-------------------|-----|------|
| CTRL+AMF vs. SOR+AMF                | -0.9180 | -3.234 to 1.398   | No  | ns   |
| CTRL+AMF vs. CM-NCubes+AMF          | -4.656  | -6.972 to -2.340  | Yes | **** |
| CTRL+AMF vs. SOR-CM-NCubes+AMF      | -3.713  | -6.029 to -1.397  | Yes | ***  |
| SOR+AMF vs. CM-NCubes+AMF           | -3.738  | -6.054 to -1.422  | Yes | ***  |
| SOR+AMF vs. SOR-CM-NCubes+AMF       | -2.795  | -5.111 to -0.4794 | Yes | **   |
| CM-NCubes+AMF vs. SOR-CM-NCubes+AMF | 0.9429  | -1.373 to 3.259   | No  | ns   |

Table S10. Statistical analysis data of RNS generation, after treatment with free sorafenib, with cell membrane-coated nanocubes (CM-NCubes), and with cell membrane-coated nanocubes loaded with sorafenib (SOR-CM-NCubes), without and with their exposure to an alternating magnetic field (AMF). The statistical method used was one-way ANOVA; ns = not significant, \* $p < 0.05$ , \*\* $p < 0.01$ , \*\*\* $p < 0.001$ , \*\*\*\* $p < 0.0001$ .

| Bonferroni's multiple comparisons test | Mean Diff. | 95.00% CI of diff. | Significant? | Summary |
|----------------------------------------|------------|--------------------|--------------|---------|
| CTRL vs. SOR                           | -0.9876    | -3.067 to 1.091    | No           | ns      |
| CTRL vs. CM-NCubes                     | -0.9850    | -3.064 to 1.094    | No           | ns      |
| CTRL vs. SOR-CM-NCubes                 | 0.1495     | -1.929 to 2.228    | No           | ns      |
| CTRL vs. CTRL+AMF                      | 0.1795     | -1.900 to 2.258    | No           | ns      |
| CTRL vs. SOR+AMF                       | -0.08655   | -2.166 to 1.992    | No           | ns      |
| CTRL vs. CM-NCubes+AMF                 | -0.3061    | -2.385 to 1.773    | No           | ns      |
| CTRL vs. SOR-CM-NCubes+AMF             | -0.5804    | -2.659 to 1.499    | No           | ns      |
| SOR vs. CM-NCubes                      | 0.002623   | -2.076 to 2.082    | No           | ns      |
| SOR vs. SOR-CM-NCubes                  | 1.137      | -0.9419 to 3.216   | No           | ns      |
| SOR vs. CTRL+AMF                       | 1.167      | -0.9119 to 3.246   | No           | ns      |
| SOR vs. SOR+AMF                        | 0.9011     | -1.178 to 2.980    | No           | ns      |
| SOR vs. CM-NCubes+AMF                  | 0.6815     | -1.397 to 2.761    | No           | ns      |
| SOR vs. SOR-CM-NCubes+AMF              | 0.4073     | -1.672 to 2.486    | No           | ns      |
| CM-NCubes vs. SOR-CM-NCubes            | 1.135      | -0.9445 to 3.213   | No           | ns      |
| CM-NCubes vs. CTRL+AMF                 | 1.164      | -0.9145 to 3.243   | No           | ns      |
| CM-NCubes vs. SOR+AMF                  | 0.8985     | -1.181 to 2.977    | No           | ns      |
| CM-NCubes vs. CM-NCubes+AMF            | 0.6789     | -1.400 to 2.758    | No           | ns      |
| CM-NCubes vs. SOR-CM-NCubes+AMF        | 0.4046     | -1.674 to 2.484    | No           | ns      |
| SOR-CM-NCubes vs. CTRL+AMF             | 0.02997    | -2.049 to 2.109    | No           | ns      |
| SOR-CM-NCubes vs. SOR+AMF              | -0.2360    | -2.315 to 1.843    | No           | ns      |

|                                            |         |                 |    |    |
|--------------------------------------------|---------|-----------------|----|----|
| <b>SOR-CM-NCubes vs. CM-NCubes+AMF</b>     | -0.4556 | -2.535 to 1.623 | No | ns |
| <b>SOR-CM-NCubes vs. SOR-CM-NCubes+AMF</b> | -0.7299 | -2.809 to 1.349 | No | ns |
| <b>CTRL+AMF vs. SOR+AMF</b>                | -0.2660 | -2.345 to 1.813 | No | ns |
| <b>CTRL+AMF vs. CM-NCubes+AMF</b>          | -0.4856 | -2.565 to 1.593 | No | ns |
| <b>CTRL+AMF vs. SOR-CM-NCubes+AMF</b>      | -0.7598 | -2.839 to 1.319 | No | ns |
| <b>SOR+AMF vs. CM-NCubes+AMF</b>           | -0.2196 | -2.299 to 1.859 | No | ns |
| <b>SOR+AMF vs. SOR-CM-NCubes+AMF</b>       | -0.4938 | -2.573 to 1.585 | No | ns |
| <b>CM-NCubes+AMF vs. SOR-CM-NCubes+AMF</b> | -0.2743 | -2.353 to 1.805 | No | ns |

Formation of the U-251 MG tumor spheroids and particle internalization

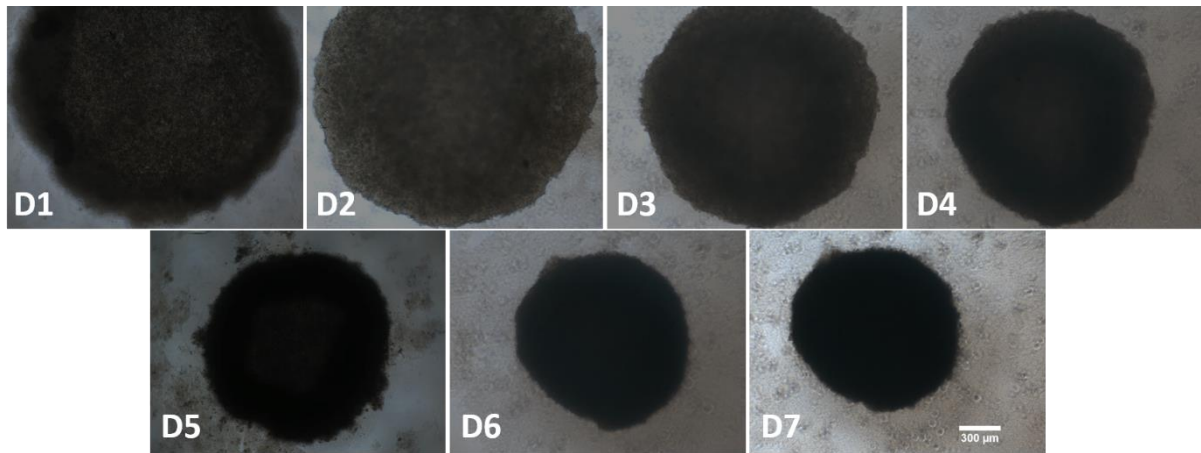

Figure S12. Optical microscopy images during the formation of the U-251 MG spheroids for 7 days. The number of seeded cells is  $100 \cdot 10^3$  /well. Scale Bar: 300 μm

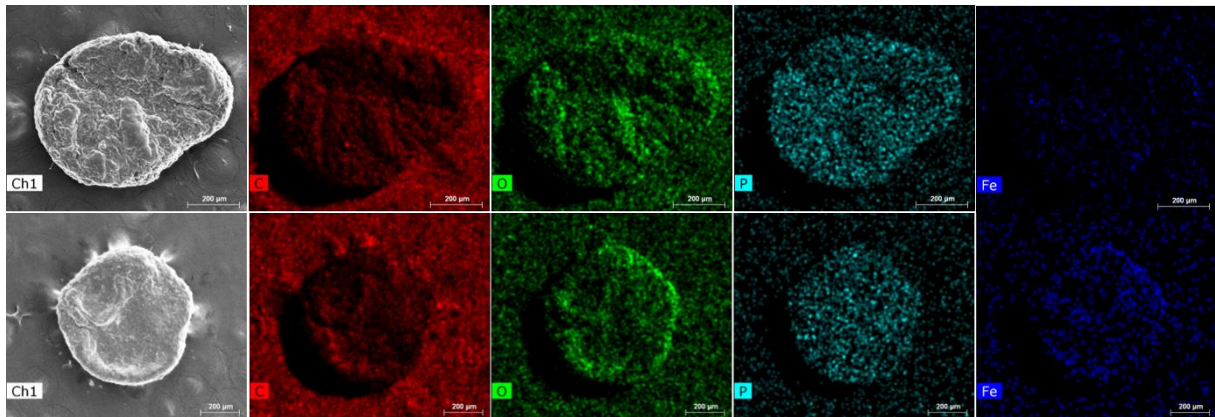

Figure S13. SEM images and EDS map of plain spheroids (top) and spheroids treated with  $100 \mu\text{g ml}^{-1}$  of CM-NCubes for 24 h (bottom). EDS mapping shows an increased percentage of Fe in the CM-NCubes-treated spheroids. Scale bar: 200 μm.

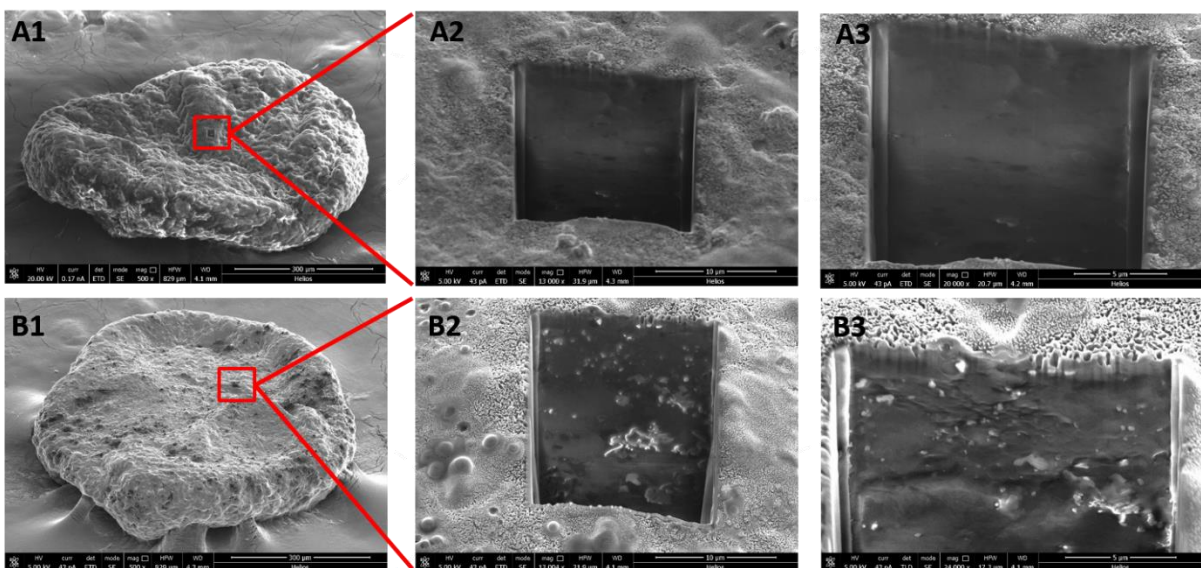

**Figure S14. Cross-section (CS) SEM images of plain spheroids (top) and spheroids treated with 100  $\mu\text{g ml}^{-1}$  of CM-NCubes (bottom) for 24 h, where the internalization of the CM-NCubes can be observed. Cross-section depth: 5  $\mu\text{m}$**

Parameters of the numerical model used for magnetic targeting

We exploited the magnetic targeting model detailed in Grillone *et al.*<sup>2</sup>; the involved parameters are listed in **Table S 12** for completeness. A few remarks are hereafter reported:

- channel geometry, fluid properties, as well as magnet geometry and magnetization were taken from Grillone *et al.*<sup>2</sup> (in particular, we defined the flow rate in order to induce a shear stress value typical of capillaries, namely 1 Pa);
- we derived the magneto-responsive volume fraction (denoted by  $\beta_m$  in Grillone *et al.*<sup>2</sup> from the measured mass fractions, namely 10.5 for the Fe/Mn (as calculated by ICP) and 88/12 for the inorganic phase / cell membrane coating (as calculated by TGA) (we assumed the following densities: 7870  $\text{kg m}^{-3}$  for Fe, 7430  $\text{kg m}^{-3}$  for Mn and 1070  $\text{kg m}^{-3}$  for cell membrane;<sup>3</sup>
- we derived the saturation magnetization of the magneto responsive phase from the measured value for CM-NCubes (**Fig. 3A** in the main text);

**Table S12. Parameters of the numerical model used for magnetic targeting**

| Parameter [unit]                                                               | Value  |
|--------------------------------------------------------------------------------|--------|
| Channel height [mm]                                                            | 0.5    |
| Channel width [mm]                                                             | 5      |
| Distance between permanent magnet and fluid channel [mm]                       | 0.86   |
| Permanent magnet diameter [mm]                                                 | 13     |
| Permanent magnet height [mm]                                                   | 10     |
| Fluid viscosity [Pa s]                                                         | 1e-3   |
| Flow rate [ $\text{ml min}^{-1}$ ]                                             | 12     |
| Permanent magnet magnetization [ $\text{A m}^{-1}$ ]                           | 1.05e6 |
| CM-NCubes radius (coating included) [nm]                                       | 10     |
| CM-NCubes magneto-responsive volume fraction [-]                               | 0.50   |
| Saturation magnetization of the magneto-responsive phase [ $\text{A m}^{-1}$ ] | 4.47e5 |

As regards the numerics, we discretized the permanent magnet by means of an equivalent currents model using 1000 current strips, and we used 40 modes to reconstruct the fluid flow (Grillone *et al.*<sup>2</sup> for details). Moreover, we virtually seeded 1248000 CM-NCubes upstream enough from the magnet (half-cross section, by symmetry), and we integrated their trajectory using the Matlab numerical environment, up to impinging on either the channel floor (capture condition) or the outflow cross-section (escape condition). Captured

carriers were then binned (bin size 100  $\mu\text{m}$ ) in order to render the capture density through a contour plot (**Fig. 7C** in the main text).

## Bibliography

1. S. Brunauer, P. H. Emmett and E. Teller, *Journal of the American Chemical Society*, 1938, **60**, 309-319.
2. A. Grillone, M. Battaglini, S. Moscato, L. Mattii, C. de Julian Fernandez, A. Scarpellini, M. Giorgi, E. Sinibaldi and G. Ciofani, *Nanomedicine (Lond)*, 2019, **14**, 727-752.
3. T. E. Thompson, Lipids, <https://www.britannica.com/science/lipid/Classification-and-formation>, (accessed April 01, 2019).
